# Supplementary material
Source: PubMed Central journal article supplement (PMC7751798)
Supplement: NIHMS1628608-supplement-1.pdf [file NIHMS1628608-supplement-1.pdf]

Supplementary Table 1.

|                            | <b>ADCC+/n</b> | <b>Odds ratio</b> | <b>95% CI</b> | <b>p-value</b>    |
|----------------------------|----------------|-------------------|---------------|-------------------|
| <b>KS status</b>           |                |                   |               | <b>0.2113</b>     |
| Control                    | 16/38          | -                 | -             |                   |
| KS                         | 8/30           | 0.5               | 0.1778-1.406  |                   |
| <b>HIV status</b>          |                |                   |               | <b>&gt;0.9999</b> |
| HIV-                       | 11/30          | -                 | -             |                   |
| HIV+                       | 13/38          | 0.8982            | 0.3303-2.442  |                   |
| <b>Sex</b>                 |                |                   |               | <b>0.3199</b>     |
| Male                       | 11/37          | -                 | -             |                   |
| Female                     | 13/31          | 1.707             | 0.6010-4.392  |                   |
| <b>KSHV Neutralization</b> |                |                   |               | <b>&gt;0.9999</b> |
| <50%                       | 8/20           | -                 | -             |                   |
| >50%                       | 10/25          | 1.000             | 0.3011-3.321  |                   |

ADCC+, number of individuals with significant ADCC activity  
n, total number of individuals

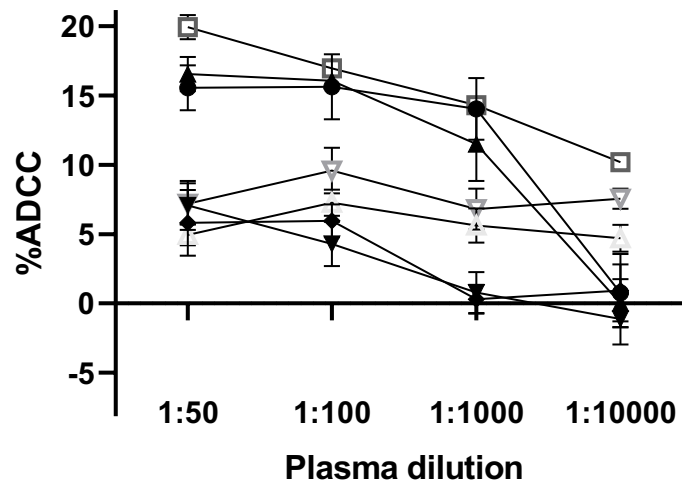

**Supplemental Figure 1.** Titration of ADCC responses in KSHV seropositive individuals. Seven additional KSHV seropositive samples were screened for ADCC activity at varying dilutions. No evidence of a prozone effect was observed and individuals with weak responses did not show significantly increased responses at higher dilutions.

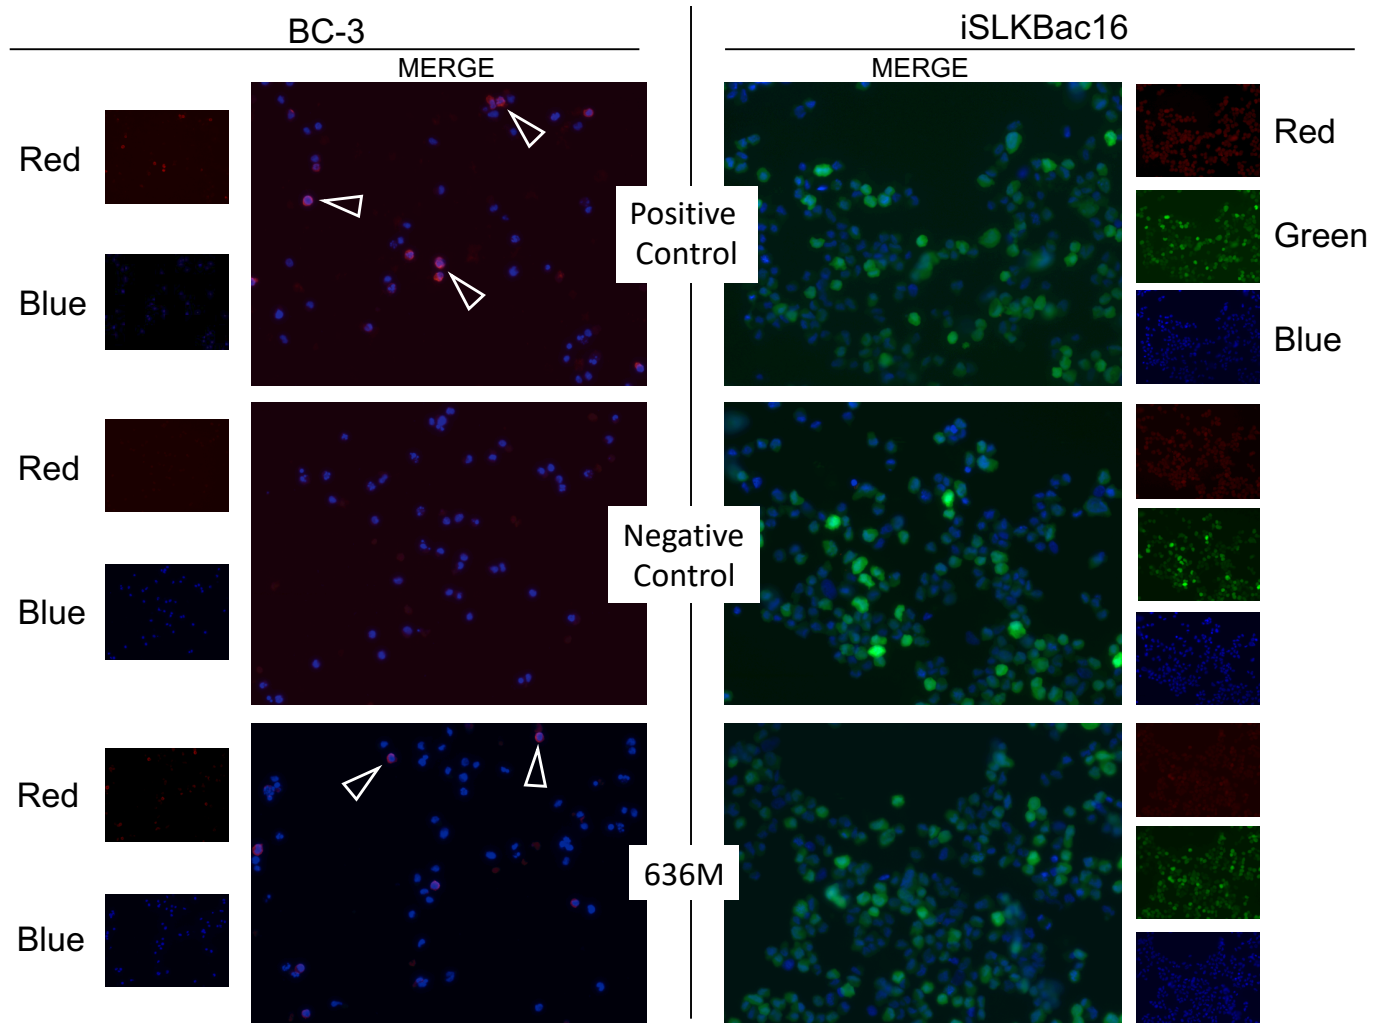

**Supplemental Figure 2.** KSHV antibody binding to BC3 and iSLKBAC16 cells. KSHV plasma binding was detected using an Alexafluor-647 conjugated antibody seen in red. DAPI was used to stain nuclei, and iSLKBAC16 cells co-express GFP. Each cell line was screened with positive and negative control plasma in addition to plasma from subject 636M, who demonstrated significant ADCC activity against BC3 cells.

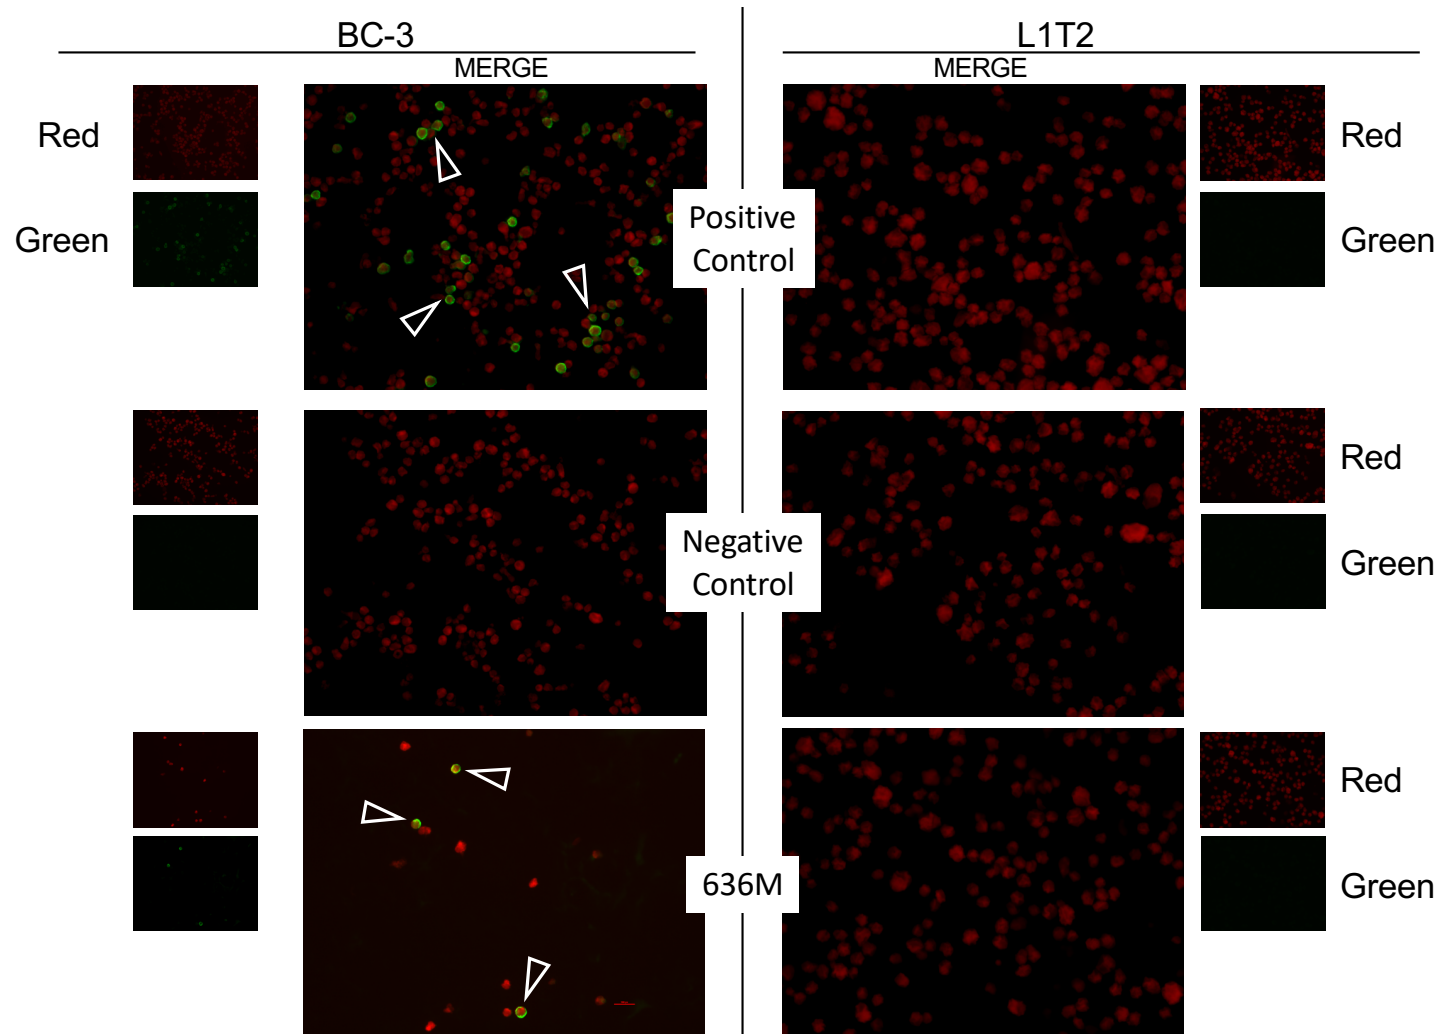

**Supplemental Figure 3.** KSHV antibody binding to BC3 and L1T2. KSHV plasma binding was detected using a Cy-2 conjugated antibody seen in green. Evan's Blue (seen as red) was used as a cellular counterstain. Each cell line was screened with positive and negative control plasma in addition to plasma from subject 636M, who demonstrated significant ADCC activity against BC3 cells.
